# Supplementary material
Source: HighWire-hosted journal article supplement (doi:10.1101/rna.079006.121)
Supplement: Supplemental_Tables.docx [file Supplemental_Tables.docx]

**Table S1. RNA/RNA interaction regions for srRNA-I fragment from *L. donovani* and *T. cruzi*.**

| ***L. donovani*** | | | | | | |
| --- | --- | --- | --- | --- | --- | --- |
| **Region** | **Nucleotide 1** | **Segment** | **Nucleotide 2** | **Distance Å / Interaction** | **HB / Type** | **Functional Groups** |
| **2*** | U56 | srRNA-II | A99 | sBP | cWW | - |
| U57 | srRNA-II | A98 | sBP | cWW | - |
| C58 | srRNA-II | G97 | sBP | cWW | - |
| **3*** | A69 | rRNA-α | C1748 | A-minor | Type II | - |
| A70 | rRNA-α | A1769 | A-minor | Type X | - |
| U71 | rRNA-α | A1770 | 3.3 | S - S | OH - OH |
| **5*** | U119 | rRNA-α | G907 | 2.6 | S - P | OH - O |
| G120 | rRNA-α | G889 | 3.6 | S - B | OH - NH2 |
| U121 | rRNA-α | G889 | 2.5 | S - S | OH - OH |
| C890 | 3.1 | P - S | O - OH |
| G907 | 3.8 | B - S | O - OH |
| **7*** | A199 | rRNA-α | G1742 | A-minor | Type X | - |
| A200**+** | rRNA-α | G1742 | A-minor | Type X | - |
| U1641**+** | 3.6 | S - S | OH - OH |
| A201**+** | rRNA-α | C1640**+** | 3.5 | S - S | OH - OH |
| A1743 | 2.4 | B - S | N - OH |
| A202 | rRNA-α | A1743 | 3.4 | B - S | N - OH |
| 3.5 | B - S | NH2 - OH |
| A29 | rRNA-α | A1743 | 3.6 | S - S | OH - OH |
| G1744 | 2.8 | S - P | OH - O |
| ***T. cruzi*** | | | | | | |
| **Region** | **Nucleotide 1** | **Segment** | **Nucleotide 2** | **Distance Å / Interaction** | **HB / Type** | **Functional Groups** |
| **2*** | U55 | srRNA-II | A95 | sBP | cWW | - |
| U56 | srRNA-II | A94 | sBP | cWW | - |
| C57 | srRNA-II | G93 | sBP | cWW | - |
| **3*** | A68 | rRNA-α | C1934 | A-minor | Type II | - |
| A69 | rRNA-α | C1933 | A-minor | Type X | - |
| A1955 |
| U70 | rRNA-α | A1956 | 2.9 | S - S | OH - OH |
| **5*** | U118 | rRNA-α | G1023 | 2.4 | S - P | OH - O |
| G119 | rRNA-α | G1023 | 3.8 | S - S | OH - OH |
| G1005 | 3.2 | S - B | OH - NH2 |
| U120 | rRNA-α | G1005 | 2.3 | S - S | OH - OH |
| U121 | rRNA-α | G1005 | 3.8 | P - S | O - OH |
| **7*** | A198 | rRNA-α | G1928 | A-minor | Type X | - |
| A199**+** | rRNA-α | G1928 | A-minor | Type X | - |
| U1774**+** | 2.8 | S - S | OH - OH |
| A200**+** | rRNA-α | C1773**+** | 2.8 | S - S | OH - OH |
| 3.0 | B - S | N - OH |
| A1929 | 2.6 | B - S | N - OH |
| 3.4 | B - S | NH2 - OH |
| A201 | rRNA-α | A1929 | 3.2 | B - S | N - OH |
| 3.5 | B - S | NH2 - OH |
| G28 | rRNA-α | A1929 | 2.7 | S - S | OH - OH |
| G1930 | 3.8 | S - P | OH - O |

**Table S1.** Details of the common RNA/RNA interaction regions within the srRNA-I segment from *L. donovani* and *T. cruzi*. These regions allow interaction of this segment with respective rRNA-α and srRNA-II segments. “Nucleotide 1” column contains the number of the nucleotide from the srRNA-I that establish interactions with other segments and their respective nucleotides (columns “Segment” and “Nucleotide 2”, respectively). Hydrogen bonding is displayed using its length in Angstroms (“Distance Å / Interaction” column). Structural elements of the nucleotide that are involved in the hydrogen bonding are shown in the “HB / Type” column denoted by capital letters, B for base, S for sugar and P for phosphate. Functional groups involved in the establishment of the hydrogen bond are shown on the last column. Standard and nonstandard base pairs (sBP and nsBP) are also shown in the “Distance Å / Interaction” column. Base pair geometry is indicated using Leontis-Westhof nomenclature (Leontis and Westhof 2001) in the “HB / Type” column. A-minor motifs and their specific types are also indicated in the “Distance Å / Interaction” and “HB / Type” columns. Members of Ribose Zipper units are marked with a plus sign (**+**) in region 7. *L. donovani* and *T. cruzi* Cryo-EM structures numbering systems are used accordingly (PDB ID 5T2A and 5T5H). Regions that are common structural elements in *T. brucei*, *L. donovani* and *T. cruzi* Cryo-EM ribosomes are mark with an asterisk (*****).

**Table S2. RNA/RNA interaction regions for srRNA-II fragment from *L. donovani* and *T. cruzi*.**

| ***L. donovani*** | | | | | | |
| --- | --- | --- | --- | --- | --- | --- |
| **Region** | **Nucleotide 1** | **Segment** | **Nucleotide 2** | **Distance Å / Interaction** | **HB / Type** | **Functional Groups** |
| **2** | U8 | rRNA-α | G455 | nsBP | cSW | - |
| G9 | 5.8s | C101 | 3.3 | B - P | NH - O |
| 3.5 | B - P | NH2 - O |
| G100 | 3.5 | B - S | N - OH |
| rRNA-α | A1506 | 3.2 | S - S | OH - OH |
| U10 | rRNA-α | A223 | nsBP | cHH | - |
| G11 | rRNA-α | C229 | sBP | cWW | - |
| A12 | rRNA-α | U228 | sBP | cWW | - |
| A13 | rRNA-α | U227 | sBP | cWW | - |
| G14 | rRNA-α | C226 | sBP | cWW | - |
| G15 | rRNA-α | C225 | sBP | cWW | - |
| G16 | rRNA-α | C224 | sBP | cWW | - |
| **3*** | G1 | srRNA-III | U2 | 3.4 | B -S | N - OH |
| A24 | srRNA-III | A3 | 3.1 | P - B | O - NH2 |
| 4.0 | P - B | O - NH2 |
| U27 | srRNA-IV | G1 | 3.0 | S - S | OH - OH |
| **4*** | A42 | rRNA-β | U1265 | 2.1 | P - S | O - OH |
| G1307 | 3.8 | S - B | OH - O |
| C133**+** | rRNA-α | U1250 | 3.5 | P - B | O - NH |
| rRNA-β | U1283**+** | 2.4 | B - S | O - OH |
| 2.9 | S - S | OH - OH |
| U134**+** | rRNA-β | C1282**+** | 2.9 | S - S | OH - OH |
| G1267 | 4.0 | S - B | OH - NH2 |
| C135 | rRNA-β | C1268 | 2.9 | S - S | OH - OH |
| A157 | rRNA-β | A1266 | A-minor | Type I | - |
| A158 | rRNA-β | A1284 | nsBP | cSW | - |
| C1265 | 3.2 | B - B | N - NH |
| **5** | A52 | rRNA-β | G1275 | 2.4 | B - S | N - OH |
| 2.9 | B - S | NH2 - OH |
| C53 | rRNA-β | A1274 | A-minor | Type II | - |
| G56 | rRNA-β | A1274 | 3.4 | B - B | O - NH2 |
| A57 | rRNA-β | A1274 | nsBP | tWW | - |
| G58 | rRNA-β | G1275 | tSS | tSS | - |
| A60 | rRNA-β | A1276 | 3.0 | S - P | OH - O |
| **6*** | A80 | rRNA-β | A79 | 3.9 | S - S | OH - OH |
| U81 | rRNA-β | C78 | 3.2 | S - B | OH - O |
| A524 | 3.5 | B - S | NH2 - OH |
| U82 | rRNA-β | U77 | 3.1 | P - S | O - OH |
| G525 | 3.1 | B - S | O - OH |
| 3.7 | S - B | OH - NH2 |
| G116 | rRNA-β | G525 | 3.1 | B - S | NH2 - OH |
| C117 | rRNA-β | G525 | 2.9 | S - P | OH - O |
| C118 | rRNA-β | A524 | 3.1 | S - S | OH - OH |
| C121 | rRNA-β | A79 | BS | - | - |
| G80 |
| **7*** | G87 | srRNA-IV | G35 | 2.9 | B - S | NH2 - OH |
| C98 | 3.3 | S - S | OH - OH |
| G88 | srRNA-IV | C36 | 2.7 | S - S | OH - OH |
| 3.2 | S - B | OH - O |
| A96 | 4.0 | S - B | OH - N |
| C97 | 2.6 | P - S | O - OH |
| C112 | srRNA-IV | C36 | 2.2 | S - P | OH - O |
| G113 | srRNA-IV | G35 | 3.2 | S - S | OH - OH |
| **8*** | G97 | srRNA-I | C58 | sBP | cWW | - |
| A98 | srRNA-I | U57 | sBP | cWW | - |
| A99 | srRNA-I | C58 | sBP | cWW | - |
| **9*** | A99 | srRNA-IV | G41 | 3.2 | S - P | OH - O |
| C100 | srRNA-IV | A40 | 4.0 | S - S | OH - OH |
| **10*** | C103 | rRNA-α | A1584 | 3.5 | S - P | OH - O |
| A104 | rRNA-α | C1585 | 3.2 | S - P | OH - O |
| A105 | rRNA-α | G1547 | 2.6 | P - B | O - NH2 |
| G106 | rRNA-α | G1547 | BS | - | - |
| **11*** | U84 | rRNA-β | U526 | 3.9 | S - S | OH - OH |
| U107 | rRNA-β | U527 | 3.8 | B - S | O - OH |
| G108**+** | rRNA-β | C300**+** | 2.2 | S - S | OH - OH |
| C109**+** | rRNA-β | A299**+** | 2.7 | S - S | OH - OH |
| 2.7 | B - S | O - OH |
| C110 | rRNA-β | U298 | 3.2 | S - P | OH - O |
| U297 | 2.8 | S - S | OH - OH |
| **12** | C143 | rRNA-α | U1270 | nsBP | tWW | - |
| **13*** | G170 | rRNA-α | G461 | 2.7 | B - B | NH2 - NH2 |
| 2.7 | B - B | NH2 - NH |
| 3.5 | B - B | NH - NH2 |
| rRNA-β | G1369 | nsBP | tWH | - |
| C172 | rRNA-β | G568 | BS | - | - |
| G1369 |
| G1370 |
| A1371 |
| A174 | rRNA-β | A1371 | 3.4 | P - B | O - NH2 |
| G13386 | BS | - | - |
| A1385 |
| A1384 |
| A1382 |
| ***T. cruzi*** | | | | | | |
| **Region** | **Nucleotide 1** | **Segment** | **Nucleotide 2** | **Distance Å / Interaction** | **HB / Type** | **Functional Groups** |
| **3*** | G21 | srRNA-IV | A3 | nsBP | t.W | - |
| A-minor | Type X | - |
| G22 | srRNA-IV | C4 | nsBP | tSW | - |
| U23 | srRNA-IV | G5 | 2.6 | S - S | OH - OH |
| C176**+** | srRNA-IV | A3**+** | 2.4 | S - B | OH - N |
| 3.2 | S - S | OH - OH |
| C175**+** | srRNA-IV | C4**+** | 2.8 | S - S | OH - OH |
| **4*** | U37 | rRNA-β | G1483 | 3.7 | S - S | OH - OH |
| A38 | rRNA-β | G1503 | 3.5 | S - B | OH - O |
| G1482 | 3.6 | P - B | O - NH2 |
| C39 | rRNA-β | G1503 | 3.5 | S - P | OH - O |
| G155 | rRNA-β | A1481 | 3.4 | S - P | OH - O |
| G1482 | 3.6 | P - S | O - OH |
| **6*** | G76**+** | rRNA-β | A80**+** | 3.5 | S - S | OH - OH |
| G77**+** | rRNA-β | C79**+** | 3.2 | S - S | OH - OH |
| U78 | rRNA-β | U78 | 2.2 | P - S | O - OH |
| G112 | rRNA-β | G688 | 3.1 | B - S | NH2 - OH |
| C113 | rRNA-β | G688 | 2.8 | S - P | OH - O |
| U114 | rRNA-β | A687 | 2.2 | S - S | OH - OH |
| C117 | rRNA-β | A80 | BS | - | - |
| G81 |
| **7*** | C81 | srRNA-IV | G106 | 3.4 | S - B | OH - O |
| 3.9 | S - B | OH - NH |
| G83 | srRNA-IV | C103 | 3.0 | S - S | OH - OH |
| G39 | 3.3 | B - S | NH2 - OH |
| G84 | srRNA-IV | C102 | 2.9 | P - S | O - OH |
|  | C40 | 2.3 | S - S | OH - OH |
|  | A41 | 3.2 | B - P | NH2 - O |
| C108 | srRNA-IV | C40 | 2.7 | S - P | OH - O |
| G109 | srRNA-IV | G39 | 3.1 | S - S | OH - OH |
| A110 | srRNA-IV | G38 | 3.6 | S - S | OH - OH |
| **8*** | G93 | srRNA-I | C57 | sBP | cWW | - |
| A94 | srRNA-I | U56 | sBP | cWW | - |
| A95 | srRNA-I | U55 | sBP | cWW | - |
| **9*** | A95 | srRNA-IV | G45 | 3.3 | S - P | OH - O |
| **10*** | C99 | rRNA-α | A1717 | 4.0 | S - P | OH - O |
| A100 | rRNA-α | C1718 | 3.4 | S - P | OH - O |
| G102 | rRNA-α | G1680 | BS | - | - |
| **11*** | U80 | rRNA-β | U689 | 3.7 | S - S | OH - OH |
| U89 | rRNA-β | G52 | 3.3 | S - B | OH - NH2 |
| G90 | rRNA-β | C53 | 2.1 | S - S | OH - OH |
| U103 | rRNA-β | U690 | 3.5 | B - S | O - OH |
| G104**+** | rRNA-β | C463**+** | 2.9 | S - S | OH - OH |
| G464 | 3.8 | S - P | OH - O |
| C105**+** | rRNA-β | A462**+** | 2.9 | S - S | OH - OH |
| U106 | rRNA-β | U460 | 3.1 | S - S | OH - OH |
| U461 | 3.4 | S - P | OH - O |
| **13*** | G166 | rRNA-β | G1565 | nsBP | tWH | - |
| A1569 | BS | - | - |
| C168 | rRNA-β | G731 | BS | - | - |
| G1565 |
| G1566 |
| A1567 |
| C169 | rRNA-β | A1567 | 4.0 | P - B | O - NH2 |

**Table S2.** Details of the RNA/RNA interaction regions within the srRNA-II segment from *L. donovani* and *T. cruzi*. These regions allow the interaction of this segment with 5.8s, rRNA-α, -β, srRNA-I, -III and -IV from *L. donovani*, and rRNA-α, -β, srRNA-I and -IV from *T. cruzi*. “Nucleotide 1” column contains the number of the nucleotide from the srRNA-II that establish interactions with other segments and their respective nucleotides (columns “Segment” and “Nucleotide 2”, respectively). Column distribution follows same pattern as Table S1. Base Stacking interactions (BS) are shown in the “Distance Å / Interaction” column. Members of Ribose Zipper units are marked with a plus superscript sign (**+**) in *L. donovani* regions 4 and 11, and *T. cruzi* regions 3, 6 and 11. *L. donovani* and *T. cruzi* Cryo-EM structures numbering systems are used accordingly (PDB ID 5T2A and 5T5H). Regions that are common structural elements in *T. brucei*, *L. donovani* and *T. cruzi* Cryo-EM ribosomes are mark with an asterisk (*****).

**Table S3. RNA/RNA interaction regions for srRNA-III fragment from *L. donovani* and *T. cruzi*.**

| ***L. donovani*** | | | | | | |
| --- | --- | --- | --- | --- | --- | --- |
| **Region** | **Nucleotide 1** | **Segment** | **Nucleotide 2** | **Distance Å / Interaction** | **HB / Type** | **Functional Groups** |
| **1*** | C65 | rRNA-α | A491 | nsBP | cSW | - |
| G492 | 3.4 | B - S | O - OH |
| A66 | rRNA-α | G644 | A-minor | Type X |  |
| **2*** | A3 | srRNA-II | G1 | BS | - | - |
| C23 | 3.8 | B - S | NH2 - OH |
| A24 | 3.1 | B - P | NH2 - O |
| U4 | srRNA-II | G1 | 3.4 | S - B | OH - N |
| 4.0 | S - B | OH - O |
| C5 | rRNA-β | C1377 | 3.8 | B - B | NH2 - N |
| 3.9 | B - B | NH2 - NH2 |
| G6 | rRNA-β | C1377 | sBP | cWW | - |
| A7 | rRNA-β | C1377 | 3.4 | B - S | N - OH |
| 2.5 | B - B | NH2 - N |
| 3.3 | B - B | NH2 - NH2 |
| 3.5 | B - B | NH2 - O |
| A8 | rRNA-β | G1378 | BS | - | - |
| G1376 |
| A1372 |
| U1375 |
| U9 | rRNA-β | A1379 | nsBP | cHW | - |
| **3*** | A14 | rRNA-β | U1388 | nsBP | c.H | - |
| A1387 | 3.8 | B - B | N - NH2 |
| 3.8 | B - B | N - NH2 |
| ***T. cruzi*** | | | | | | |
| **Region** | **Nucleotide 1** | **Segment** | **Nucleotide 2** | **Distance Å / Interaction** | **HB / Type** | **Functional Groups** |
| **1*** | U65 | rRNA-α | U740 | 3.6 | B - S | O - OH |
| C66 | rRNA-α | A495 | nsBP | cSW | - |
| A67 | rRNA-α | G741 | A-minor | Type X | - |
| **2*** | C1 | rRNA-β | C1573 | BS | - | - |
| G2 | rRNA-β | C1573 | sBP | cWW | - |
| A3 | rRNA-β | C1573 | 3.1 | B - S | NH2 - OH |
| 3.5 | B - B | NH2 - N |
| 3.7 | B - B | NH2 - O |
| G1574 | 3.1 | B - S | N - OH |
| A4 | rRNA-β | A1575 | nsBP | tW. | - |
| rRNA-β | A1568 | BS | - | - |
| U1571 |
| G1572 |
| G1574 |
| U5 | rRNA-β | A1575 | sBP | cWW | - |
| rRNA-β | A1568 | BS | - | - |
| U1571 |
| G1572 |
| G1574 |
| **3*** | A10 | rRNA-β | A1581 | 3.2 | B - S | NH2 - OH |

**Table S3.** Details of the common RNA/RNA interaction regions within the srRNA-III segment from *L. donovani* and *T. cruzi*. These regions allow the interaction of this segment with rRNA-α, -β and srRNA-II from *L. donovani*, and rRNA-α and -β from *T. cruzi*. “Nucleotide 1” column contains the number of the nucleotide from the srRNA-III that establish interactions with other segments and their respective nucleotides (columns “Segment” and “Nucleotide 2”, respectively). Column distribution follows same pattern as Table S1. Base Stacking interactions (BS) are shown in the “Distance Å / Interaction” column. *L. donovani* and *T. cruzi* Cryo-EM structures numbering systems are used accordingly (PDB ID 5T2A and 5T5H). Regions that are common structural elements in *T. brucei*, *L. donovani* and *T. cruzi* Cryo-EM ribosomes are mark with an asterisk (*****).

**Table S4. RNA/RNA interaction regions for srRNA-IV fragment from *L. donovani* and *T. cruzi*.**

| ***L. donovani*** | | | | | | |
| --- | --- | --- | --- | --- | --- | --- |
| **Region** | **Nucleotide 1** | **Segment** | **Nucleotide 2** | **Distance Å / Interaction** | **HB / Type** | **Functional Groups** |
| **1*** | G1 | srRNA-II | U27 | 3.0 | S - S | OH - OH |
| **2** | C5 | rRNA-α | A1570 | A-minor | Type I | - |
| G123 |
| C121 | rRNA-α | A1567 | 4.0 | P - B | O - NH2 |
| A1568 | 3.5 | P - B | O - NH2 |
| A122 | rRNA-α | C1566 | 2.3 | B - S | NH2 - OH |
| **3*** | A13 | rRNA-β | A572 | A-minor | Type X | - |
| C14 | rRNA-β | A572 | 3.7 | B - S | O - OH |
| A1365 | 3.4 | B - S | NH2 - OH |
| A68 | BS | - | - |
| A69 |
| G70 |
| G15 | rRNA-β | A1365 | 2.5 | B - S | N - OH |
| G1366 | 3.1 | S - S | OH - OH |
| A16 | rRNA-β | G1366 | 2.7 | S - P | 0H - O |
| A102 | rRNA-β | A67 | BS | - | - |
| **4** | U107 | rRNA-β | U1450 | 3.5 | S - S | OH - OH |
| **5*** | G35 | srRNA-II | G113 | 3.2 | S - S | OH - OH |
| C36 | srRNA-II | G88 | 2.7 | S - S | OH - OH |
| 3.1 | S - B | OH - N |
| A37 | srRNA-II | G88 | 3.8 | P - B | O - NH2 |
| C97 | srRNA-II | G88 | 2.6 | S - P | OH - O |
| C98 | srRNA-II | G87 | 3.3 | S - S | OH - OH |
| U100 | srRNA-II | A115 | 4.0 | B - S | NH - OH |
| **6*** | A40 | srRNA-II | C100 | 4.0 | S - S | OH - OH |
| G41 | srRNA-II | A99 | 3.2 | P - S | O - OH |
| **7*** | A69 | rRNA-β | C124 | A-minor | Type I | - |
| A292 |
| G70 | rRNA-β | U125 | 3.1 | S - S | OH - OH |
| 3.9 | B - S | NH2 - OH |
| G71 | rRNA-β | C126 | 2.8 | S - P | OH - O |
| G86**+** | rRNA-β | C124**+** | 3.5 | S - S | OH - OH |
| U125 | 3.9 | S - P | OH - O |
| A87**+** | rRNA-β | G123**+** | A-minor | Type I | - |
| C293 |
| G88 | rRNA-β | U294 | 2.6 | S - S | OH - OH |
| ***T. cruzi*** | | | | | | |
| **Region** | **Nucleotide 1** | **Segment** | **Nucleotide 2** | **Distance Å / Interaction** | **HB / Type** | **Functional Groups** |
| **1*** | C2 | srRNA-II | A178 | BS | - | - |
| A3**+** | srRNA-II | G21 | nsBP | t.W | - |
| C176**+** | A-minor | Type X | - |
| C4**+** | srRNA-II | G22 | nsBP | tSW | - |
| C175**+** | 2.8 | S - S | OH - OH |
| G5 | srRNA-II | U23 | 2.6 | S - S | OH - OH |
| **3*** | A17 | rRNA-β | A735 | A-minor | Type X | - |
| C18 | rRNA-β | A1561 | 2.9 | B - S | NH2 - OH |
| 3.8 | B - S | N - OH |
| A69 | BS | - | - |
| A70 |
| G71 |
| G19 | rRNA-β | A1561 | 2.4 | B - S | N - OH |
| G1562 | 3.6 | S - S | OH - OH |
| A69 | BS | - | - |
| A70 |
| G71 |
| A20 | rRNA-β | G1562 | 3.4 | S - P | OH - O |
| A69 | BS | - | - |
| A70 |
| G71 |
| A107 | rRNA-β | A69 | 2.5 | B - P | NH2 - O |
| **5*** | G38 | srRNA-II | A110 | 3.6 | S - S | OH - OH |
| G39 | srRNA-II | G109 | 3.1 | S - S | OH - OH |
| C40 | srRNA-II | G84 | 2.3 | S - S | OH - OH |
| C108 | 2.7 | P - S | O - OH |
| C102 | srRNA-II | G84 | 2.9 | S - P | OH - O |
| C103 | srRNA-II | G83 | 3.0 | S - S | OH - OH |
| G106 | srRNA-II | C81 | 3.4 | B - S | N - OH |
| 3.9 | B - S | O - OH |
| **6*** | G45 | srRNA-II | A95 | 3.3 | P - S | O - OH |
| **7*** | U64 | rRNA-β | A455 | nsBP | cWS | - |
| C125 | 3.8 | B - S | O - OH |
| G65 | rRNA-β | U126 | 2.5 | B – S | N – OH |
| 3.4 | S - S | OH - OH |
| C127 | 3.0 | B - P | NH2 - O |
| 4.0 | S - S | OH – OH |
| G66 | rRNA-β | C127 | 2.5 | S - P | OH - O |
| G91 | rRNA-β | C125 | 3.7 | S - S | OH - OH |
| A92 | rRNA-β | C124 | A-minor | Type I | - |
| G456 |
| G93 | rRNA-β | U457 | 3.3 | S - S | OH - OH |
| G458 | 4.0 | S - P | OH - O |

**Table S4.** Details of the RNA/RNA interaction regions within the srRNA-IV segment from *L. donovani* and *T. cruzi*. These regions allow the interaction of this segment with rRNA-α, -β and srRNA-II from *L. donovani*, and rRNA-β and srRNA-II from *T. cruzi*. “Nucleotide 1” column contains the number of the nucleotide from the srRNA-III that establish interactions with other segments and their respective nucleotides (columns “Segment” and “Nucleotide 2”, respectively). Column distribution follows same pattern as Table S1. Base Stacking interactions (BS) are shown in the “Distance Å / Interaction” column. Members of Ribose Zipper units are marked with a plus superscript sign (**+**) in *L. donovani* region 7, and *T. cruzi* region 1. *L. donovani* and *T. cruzi* Cryo-EM structures numbering systems are used accordingly (PDB ID 5T2A and 5T5H). Regions that are common structural elements in *T. brucei*, *L. donovani* and *T. cruzi* Cryo-EM ribosomes are mark with an asterisk (*****).

**Table S5. *T. brucei*’s segments correspondences with *S. cerevisiae*.**

| **srRNA** | ***T. brucei*** | | ***S. cerevisiae*** | |
| --- | --- | --- | --- | --- |
| **Starts** | **Ends** | **Starts** | **Ends** |
| 5s | G1 | U119 | G1 | U121 |
| 5.8s | A1 | G169 | A2 | A155 |
| rRNA-α | G3 | G1846 | G5 | G1624 |
| rRNA-β | A6 | U1452 | A1823 | A2994 |
| srRNA-I | U1 | G206 | C1633 | G1812 |
| srRNA-II | G25 | C180 | G2997 | U3151 |
| srRNA-III | A19 | C60 | G3176 | A3215 |
| srRNA-IV | U2 | U134 | A3294 | U3394 |

**Table S5.** Base correspondence of starting and ending nucleotides of each segment from the *Trypanosoma brucei* LSU when structurally aligned against *Saccharomyces cerevisiae* LSU rRNA. *T. brucei* and *S. cerevisiae* numbering systems are using accordingly. Structural alignments were performed using the *cealign* algorithm implemented inside PyMOL software over rRNA segments from *T. brucei* Cryo-EM structure (PDBID 4V8M, Hashem et al 2013) against the *S. cerevisiae* crystallographic structure (PDBID 4V88, Ben-Shem et al 2011). This data was used to derive the secondary structure of each rRNA segment from *T. brucei* out of the well-established secondary structure of *S. cerevisiae*.

**Table S6. Details of the 2ʹOH hydrogen bonds that likely contribute to the stabilization of the segmented ribosomes from *T. brucei*, *L. donovani* and *T. cruzi*.**

|  | ***T. brucei*** | | | **2ʹOH Hydrogen Bonds** | | | | | | | | | | | |
| --- | --- | --- | --- | --- | --- | --- | --- | --- | --- | --- | --- | --- | --- | --- | --- |
| **HBT** | **W/2ʹOH** | **%** | **OH - OH** | **%** | **O - OHB** | **%** | **O - OHP** | **%** | **NH2 - OH** | **%** | **N - OH** | **%** | **NH - OH** | **%** |
| **srRNA-I** | 31 | 22 | 70.97 | 6 | 27.27 | 5 | 22.73 | 5 | 22.73 | 5 | 22.73 | 1 | 4.55 | 0 | 0.00 |
| **srRNA-II** | 70 | 48 | 68.57 | 12 | 25.00 | 6 | 12.50 | 14 | 29.17 | 8 | 16.67 | 8 | 16.67 | 0 | 0.00 |
| **srRNA-III** | 14 | 8 | 57.14 | 1 | 12.50 | 1 | 12.50 | 1 | 12.50 | 2 | 25.00 | 2 | 25.00 | 1 | 12.50 |
| **srRNA-IV** | 26 | 18 | 69.23 | 7 | 38.89 | 1 | 5.56 | 5 | 27.78 | 2 | 11.11 | 3 | 16.67 | 0 | 0.00 |
| **Global** | 141 | 96 | **68.09** | 26 | **27.08** | 13 | 13.54 | 25 | **26.04** | 17 | 17.71 | 14 | 14.58 | 1 | 1.04 |
|  | ***L. donovani*** | | | **2ʹOH Hydrogen Bonds** | | | | | | | | | | | |
| **HBT** | **W/2ʹOH** | **%** | **OH - OH** | **%** | **O - OHB** | **%** | **O - OHP** | **%** | **NH2 - OH** | **%** | **N - OH** | **%** | **NH - OH** | **%** |
| **srRNA-I** | 13 | 13 | 100.00 | 5 | 38.46 | 1 | 7.69 | 3 | 23.08 | 2 | 15.38 | 2 | 15.38 | 0 | 0.00 |
| **srRNA-II** | 54 | 42 | 77.78 | 15 | 35.71 | 7 | 16.67 | 10 | 23.81 | 6 | 14.29 | 4 | 9.52 | 0 | 0.00 |
| **srRNA-III** | 13 | 5 | 38.46 | 0 | 0.00 | 2 | 40.00 | 0 | 0.00 | 1 | 20.00 | 2 | 40.00 | 0 | 0.00 |
| **srRNA-IV** | 25 | 22 | 88.00 | 10 | 45.45 | 1 | 4.55 | 5 | 22.73 | 3 | 13.64 | 2 | 9.09 | 1 | 4.55 |
| **Global** | 105 | 82 | **78.10** | 30 | **36.59** | 11 | 13.41 | 18 | **21.95** | 12 | 14.63 | 10 | 12.20 | 1 | 1.22 |
|  | ***T. cruzi*** | | | **2ʹOH Hydrogen Bonds** | | | | | | | | | | | |
| **HBT** | **W/2ʹOH** | **%** | **OH - OH** | **%** | **O - OHB** | **%** | **O - OHP** | **%** | **NH2 - OH** | **%** | **N - OH** | **%** | **NH - OH** | **%** |
| **srRNA-I** | 15 | 15 | 100.00 | 6 | 40.00 | 0 | 0.00 | 3 | 20.00 | 3 | 20.00 | 3 | 20.00 | 0 | 0.00 |
| **srRNA-II** | 39 | 36 | 92.31 | 16 | 44.44 | 3 | 8.33 | 12 | 33.33 | 3 | 8.33 | 1 | 2.78 | 1 | 2.78 |
| **srRNA-III** | 6 | 4 | 66.67 | 0 | 0.00 | 1 | 25.00 | 0 | 0.00 | 2 | 50.00 | 1 | 25.00 | 0 | 0.00 |
| **srRNA-IV** | 26 | 24 | 92.31 | 11 | 45.83 | 2 | 8.33 | 6 | 25.00 | 1 | 4.17 | 4 | 16.67 | 0 | 0.00 |
| **Global** | 86 | 79 | **91.86** | 33 | **41.77** | 6 | 7.59 | 21 | **26.58** | 9 | 11.39 | 9 | 11.39 | 1 | 1.27 |

**Table S6.** Numerical description of the abundance of the 2ʹOHs that are involved in the hydrogen bonding within regions of interaction which aid in the association of the four srRNA fragments. Fist column contains each segment order by the organism, *T. brucei*, *L. donovani* and *T. cruzi*. The second, third and fourth columns contain the total individual hydrogen bonds found (label HBT), those that are associated with the 2ʹOH (label W/2ʹOH) and the percentage they represent from the total hydrogen bonds respectively. The following columns present the number of hydrogen bonds (HBs) that are established with the 2ʹOH group. Columns five and six contain the number of HBs established by two 2ʹOHs and the percentage they represent. The columns seventh and eighth contain the number of HBs that are establish by one 2ʹOH and an oxygen that comes from a base (O - OHB), and the percentage they represent. The columns nineth and tenth contain the number of HBs that are establish by one 2ʹOH and an oxygen that comes from a phosphate (O - OHP), and the percentage they represent. Subsequent columns follow the same trend for the nitrogen atoms from nucleobases in establishing HBs with the 2ʹOH. As can be seen the latter are less abundant. In the raw marked as Global for each organism the total amount of HBs and HBs associated with 2ʹOH from the srRNA segments are presented as well as their percentages (green). The most abundant form of hydrogen bonding with a 2ʹOH is with another 2ʹOH (global percentage in red). The second most abundant form of hydrogen bonding of a 2ʹOH is formed with an oxygen from a phosphate group (global percentage in orange). Only one exception was found in the CryoEM structure of srRNA-III from *L. donovani* whose dominant form of creating a HB is by using the NH2 group from either cytosine or adenine (see Table S3).
